# Supplementary material for: A novel TCO- and Pt-free counter electrode for high efficiency dye-sensitized solar cells
Source: Royal Society of Chemistry journal article supplement (doi:10.1039/c2ta00974a), 2012-11-21
Supplement: c2ta00974a.pdf [file c2ta00974a.pdf]

## Electronic Supplementary Information

# A novel TCO- and Pt-free counter electrode for high efficiency dye-sensitized solar cells

Teng-Long Zhang, Hong-Yan Chen,\* Cheng-Yong Su and Dai-Bin Kuang\*

*MOE Key Laboratory of Bioinorganic and Synthetic Chemistry, KLGHEI of Environment and Energy Chemistry, State Key Laboratory of Optoelectronic Materials and Technologies, School of Chemistry and Chemical Engineering, Sun Yat-sen University, Guangzhou 510275 P. R. China*

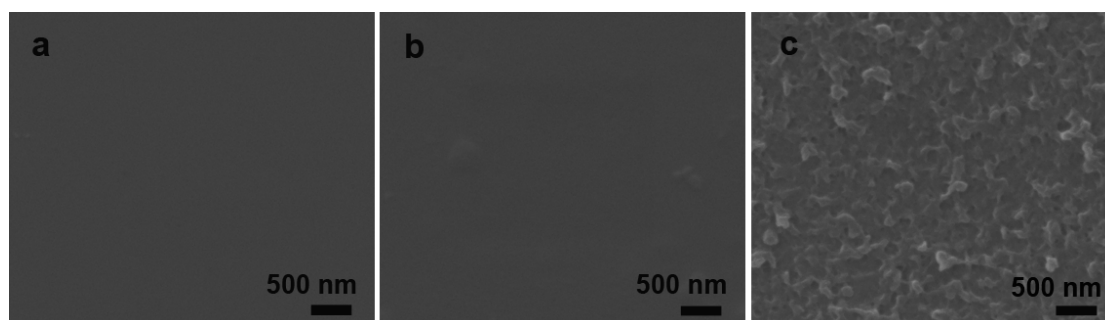

**Fig. S1** SEM images of pristine PEDOT:PSS film (a), EG-treated PEDOT:PSS film (b), and electrodeposited PEDOT catalytic film on the top of EG-treated PEDOT:PSS film (c). The surface of the pristine PEDOT:PSS film is very smooth on the glass substrate with no obvious grains. After the EG-treatment, some grains appear on the surface, and a more granular film forms when a layer of PEDOT catalyst is electrodeposited on the surface.
